# Supplementary material for: Functional mesoporous aluminosilicate nanoparticles as host material to fabricate photo-switchable polymer films
Source: Royal Society of Chemistry journal article supplement (doi:10.1039/c0jm03986a), 2011-01-01
Supplement: c0jm03986a.pdf [file c0jm03986a.pdf]

## Supplementary information for

# Functional Mesoporous Alumosilicate Nanoparticles as Host Material to Fabricate Photo-switchable Polymer Films

*Ingolf Kahle,<sup>a</sup> Oliver Tröber,<sup>b</sup> Sabine Trentsch,<sup>c</sup> Hannes Richter,<sup>b</sup> Bernd Grünler,<sup>c</sup> Steffen Hemeltjen,<sup>d</sup> Maik Schlesinger,<sup>e</sup> Michael Mehring<sup>e</sup> and Stefan Spange<sup>\*a</sup>*

Content:

- $^{13}\text{C}\{-^1\text{H}\}$ -CP-MAS NMR spectra of faujasite materials after SIBOR of **1**, **2**, and **3** inside the supercages
- AM<sub>1</sub> calculations of the open, colored forms of photochromic molecules **1**, **2**, and **3**
- DRIFT spectra of the faujasites, photochromic dyes **1**, **2**, and **3**, and of the dye-loaded Y zeolites
- UV/Vis spectra of photochromic dyes **1**, **2**, and **3** in acidic solvents
- Using Fe(phen)<sub>2</sub>(CN)<sub>2</sub> as established solvatochromic surface polarity probe
- Bleaching kinetics and fitted curves with I<sub>1</sub>, I<sub>2</sub>, I<sub>∞</sub>, s<sub>1</sub> and s<sub>2</sub> being the fitting parameters
- UV/Vis spectra of polyethylene films doped with dye-loaded alumosilica particles

*$^{13}\text{C}\{-^1\text{H}\}$ -CP-MAS NMR spectra of faujasite materials after SIBOR of **1**, **2**, and **3** inside the supercages (Asterisks indicates residual solvents used during the SIBOR).*

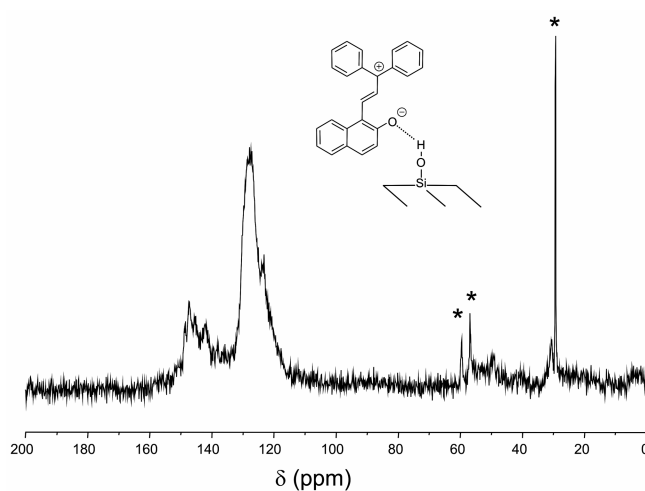

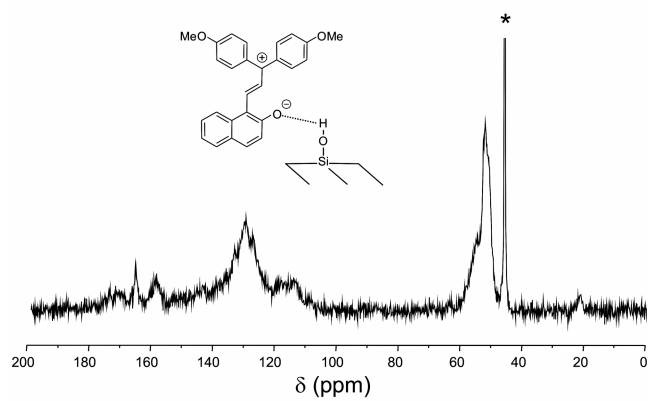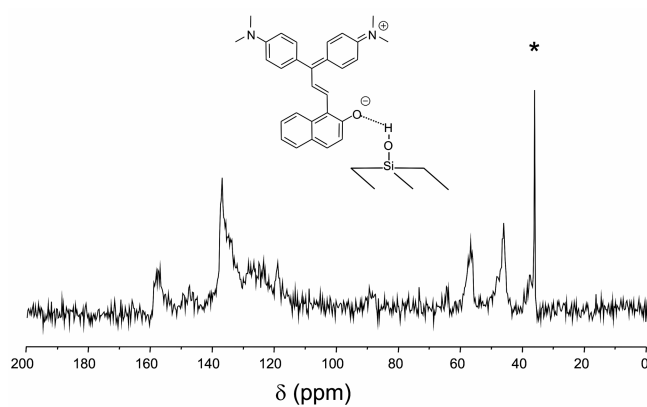

*AM<sub>1</sub> calculations of the open, colored forms of photochromic molecules 1, 2, and 3:*

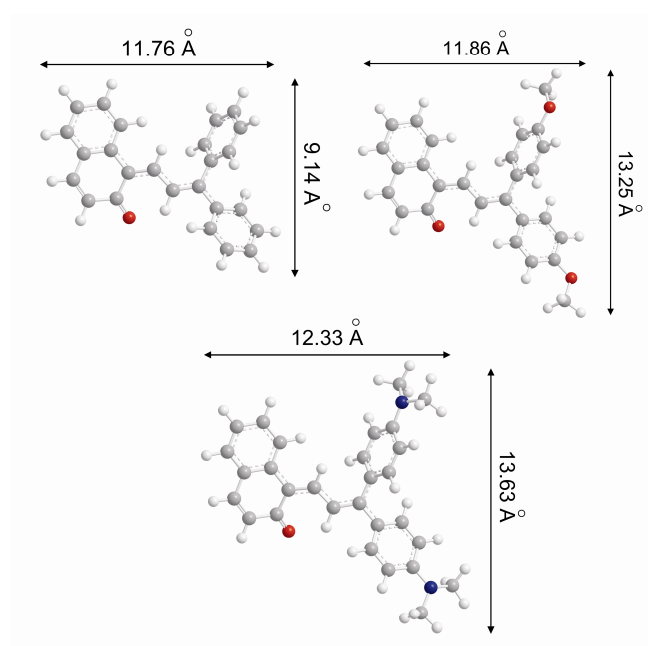

*DRIFT spectra of the faujasites, photochromic dyes 1, 2, and 3, and of the dye-loaded Y zeolites:*

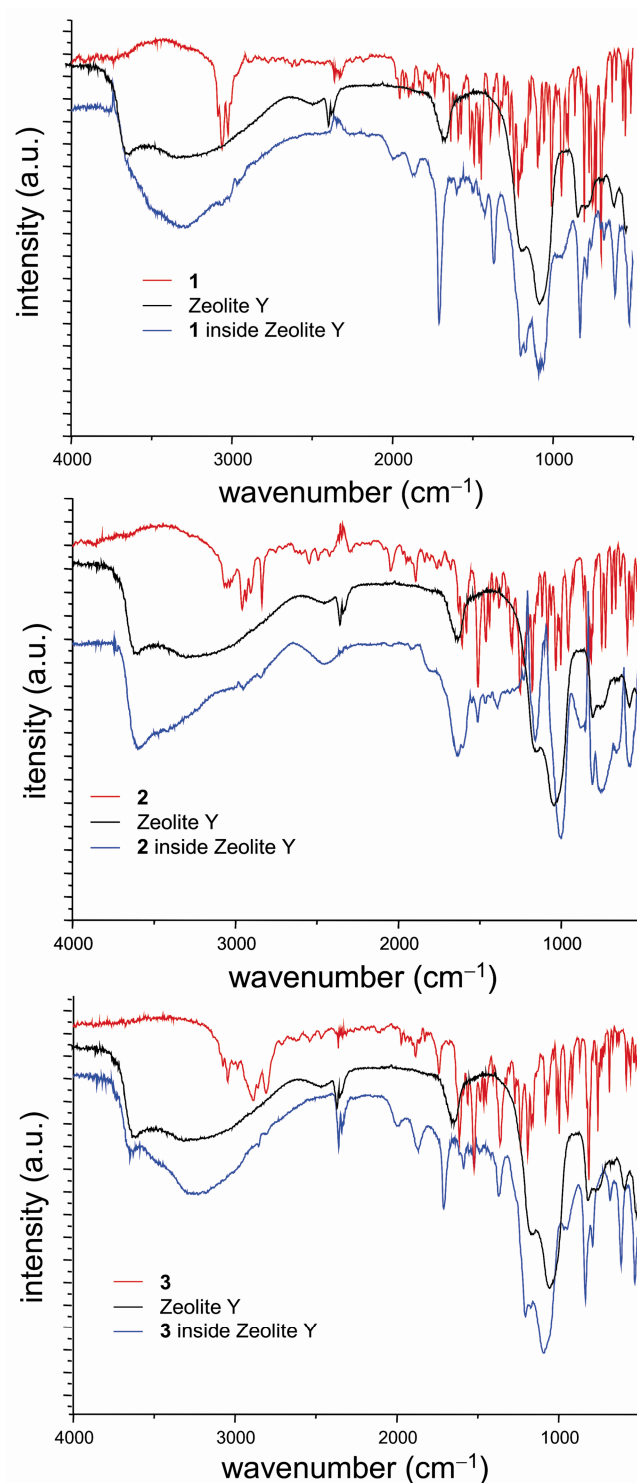

*UV/Vis spectra of photochromic dyes 1, 2, and 3 in acidic solvents:*

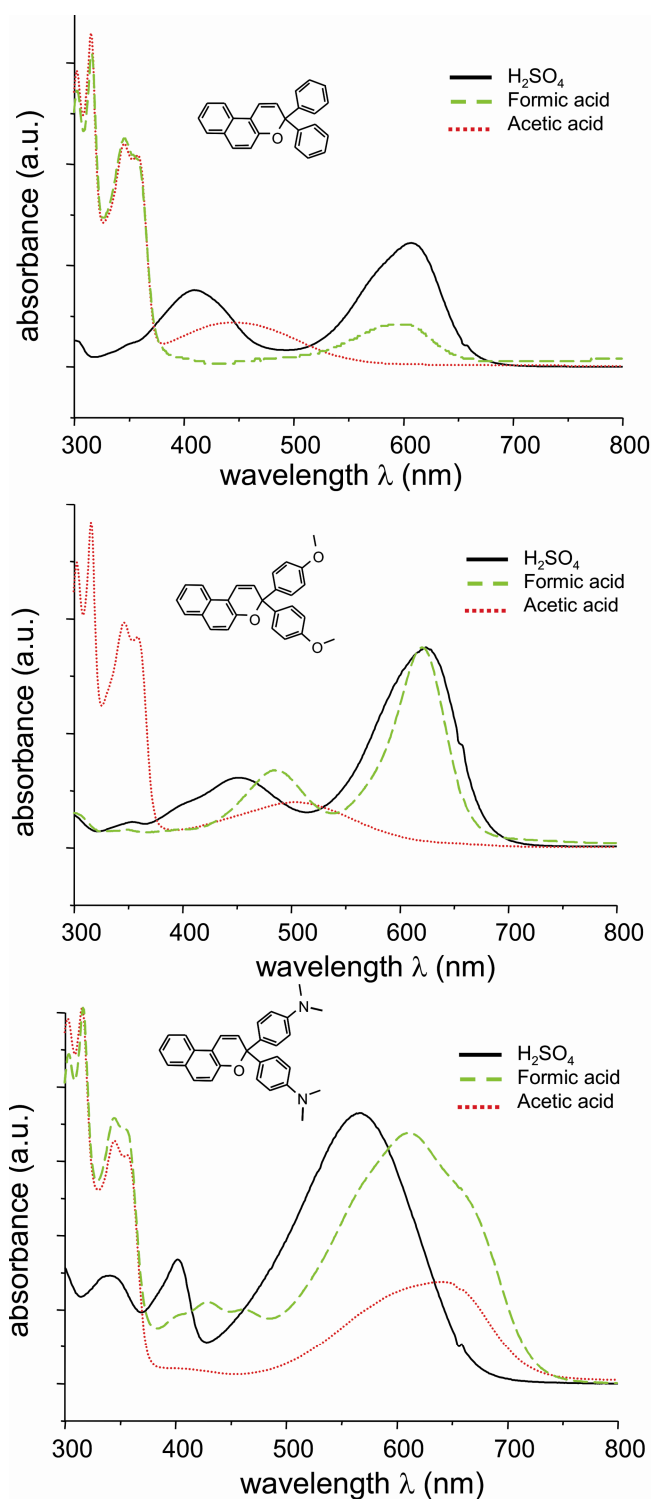

*Using Fe(phen)<sub>2</sub>(CN)<sub>2</sub> as established solvatochromic surface polarity probe:*

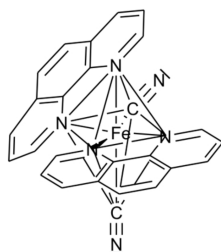

Equation 1 was used to determine the Kamlet-Taft parameter  $\alpha$ .

$$\alpha = -7.49 + 0.46\tilde{\nu}_{\max} ([\text{Fe}(\text{phen})_2(\text{CN})_2]) \times 10^{-3} \text{ cm}^{-1} \quad (1)$$

$n = 26; r = 0.96; sd = 0.15; F < 0.0001$

| Host        | $\lambda_{\max}$ [nm] | $\nu_{\max} \cdot 10^{-3} [\text{cm}^{-1}]$ | $\alpha$ |
|-------------|-----------------------|---------------------------------------------|----------|
| zeolite HY  | 500                   | 20.00                                       | 1.71     |
| zeolite DAY | 516                   | 19.38                                       | 1.43     |
| MCM 41      | 510                   | 19.61                                       | 1.53     |
| MCM 48      | 529                   | 18.91                                       | 1.21     |

Bleaching kinetics and fitted curves with  $I_1$ ,  $I_2$ ,  $I_{\infty}$ ,  $s_1$  and  $s_2$  being the fitting parameters.

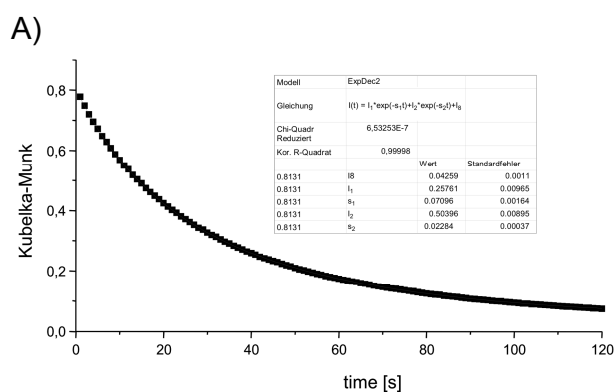

A) Loss in intensity of absorption at 450 nm over time for irradiated dye 1 (10 wt%) in MCM 41S (■ experimental data, — fit)

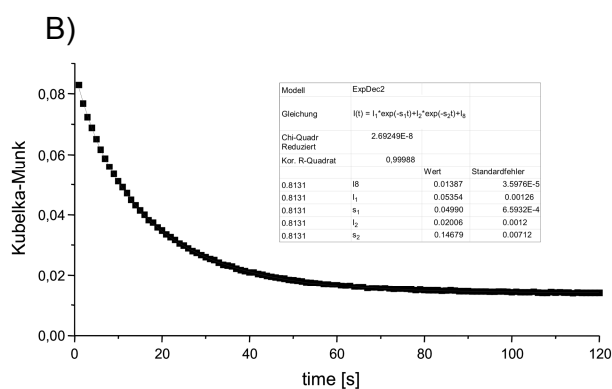

B) Loss in intensity of absorption at 495 nm over time for irradiate dye 2 (10 wt%) in MCM 41S (■ experimental data, — fit)

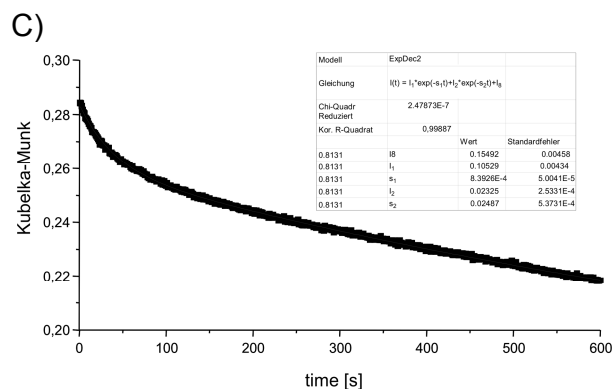

C) Loss in intensity of absorption at 550 nm over time for irradiated dye 3 (10 wt%) in MCM 41S (■ experimental data, — fit)

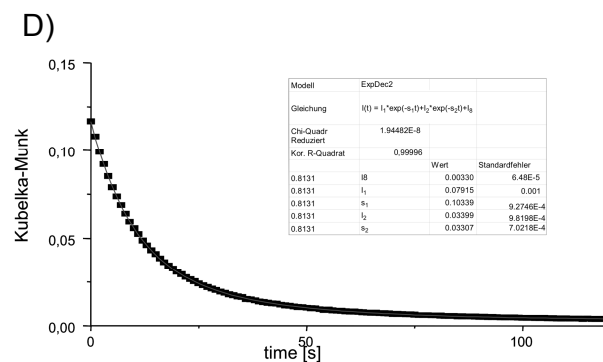

D) Loss in intensity of absorption at 450 nm over time for irradiate dye 1 (10 wt%) in MCM 48S (■ experimental data, — fit)

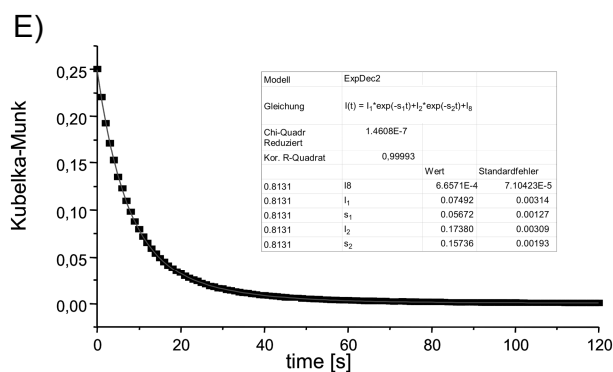

E) Loss in intensity of absorption at 495 nm over time for irradiated dye 2 (10 wt%) in MCM 48S (■ experimental data, — fit)

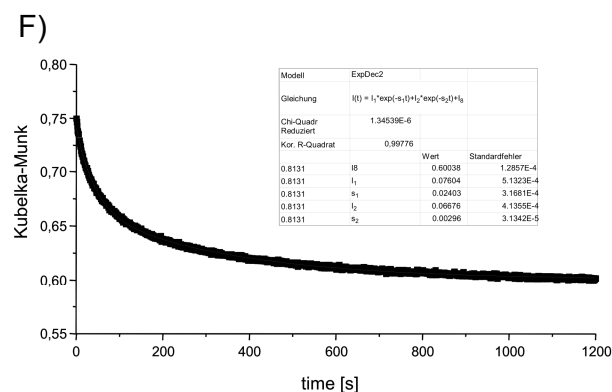

F) Loss in intensity of absorption at 550 nm over time for irradiate dye 3 (10 wt%) in MCM 48S (■ experimental data, — fit)

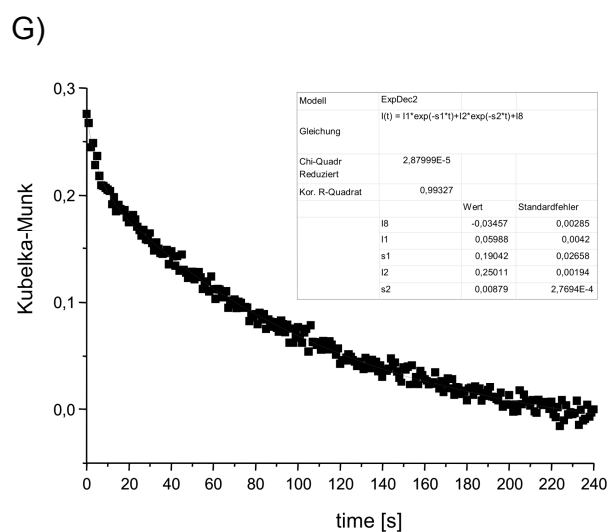

G) Loss in intensity of absorption at 450 nm over time for irradiated film doped with 2 wt% MCM 41S particles containing 1 (■ experimental data, — fit)

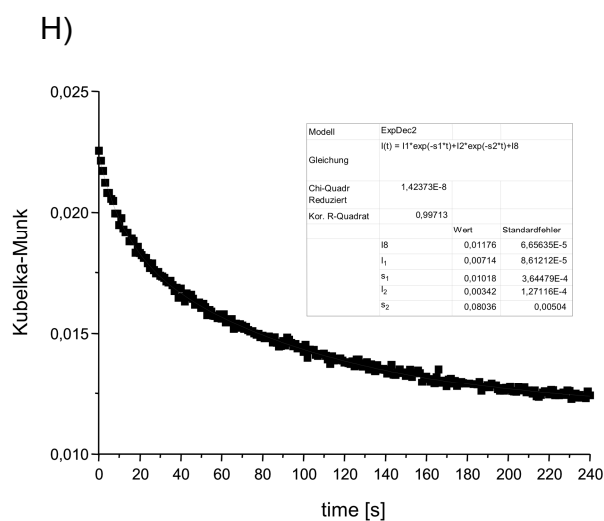

H) Loss in intensity of absorption at 490 nm over time for PE irradiated film doped with 2 wt% MCM 41S particles containing 2 (■ experimental data, — fit)

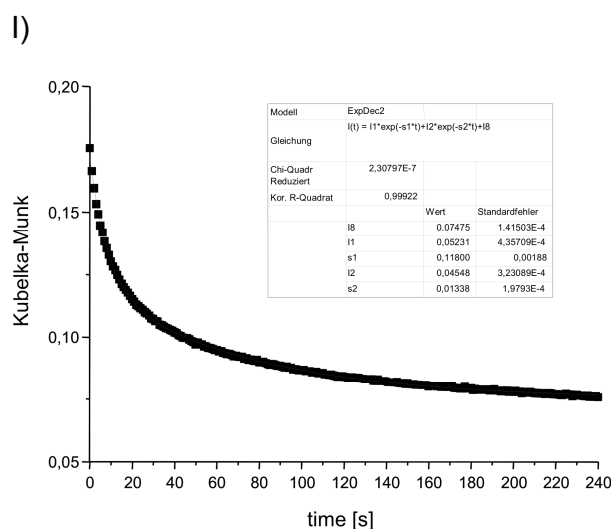

I) Loss in intensity of absorption at 450 nm over time for irradiated film doped with 2 wt% MCM 48S particles containing 1

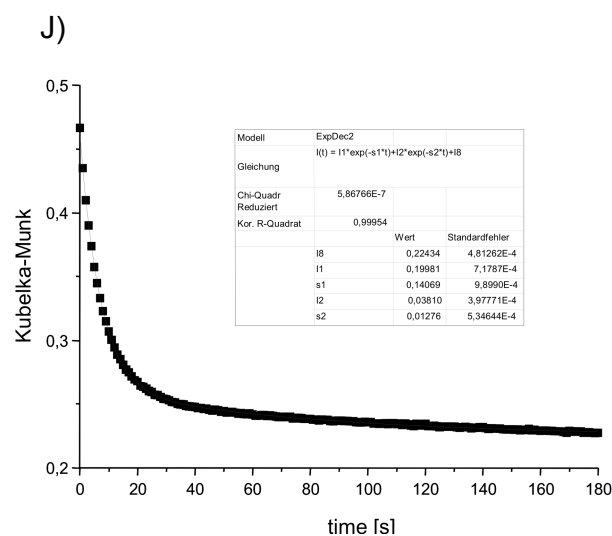

J) Loss in intensity of absorption at 490 nm over time for PE irradiated film doped with 2 wt% MCM 48S particles

(■ experimental data, — fit)

containing **2** (■ experimental data, — fit)

*UV/Vis-absorption spectra of polyethylene films doped with dye-loaded aluminosilica particles*

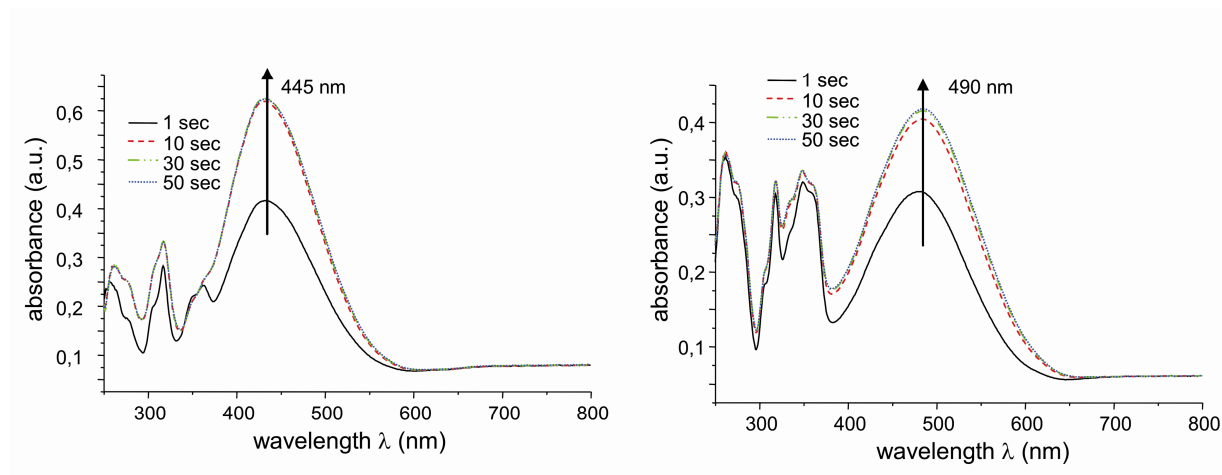

UV/Vis induced spectral evolution of PE films doped with MCM 41S containing **1** (left) and MCM 41S containing **2** (right) upon irradiation with a Xenon lamp (290 to 900 nm).

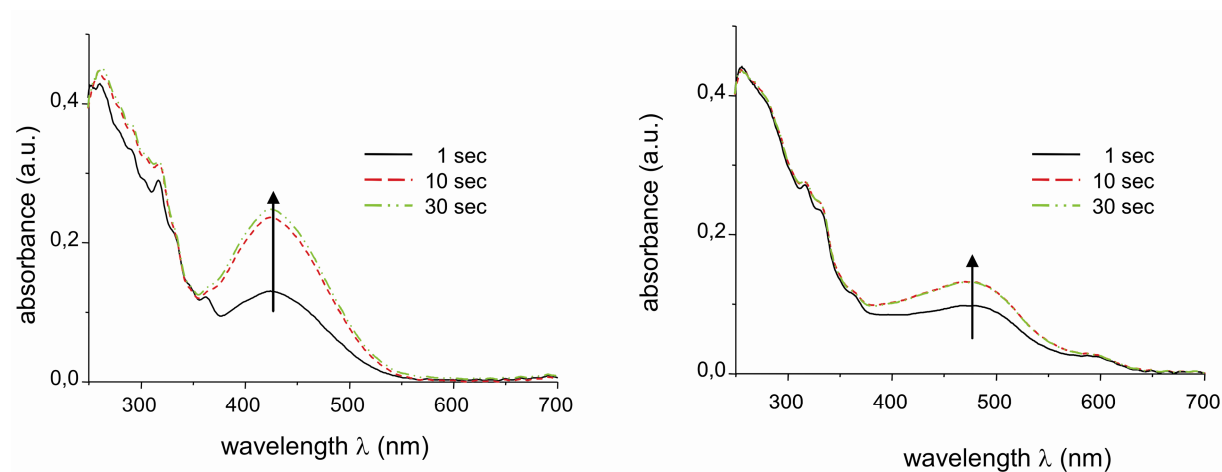

UV/Vis induced spectral evolution of PE films doped with MCM 48S containing **1** (left) and MCM 48S containing **2** (right) upon irradiation with a Xenon lamp (290 to 900 nm).
